# Supplementary material
Source: Springer Nature journal article supplement (https://www.springermedizin.de/resource/supplementary/12947_2010_359_MOESM2_ESM.pdf/9556816)

**A**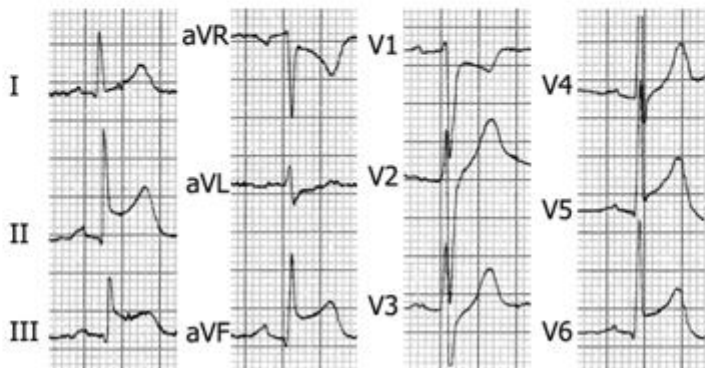**B**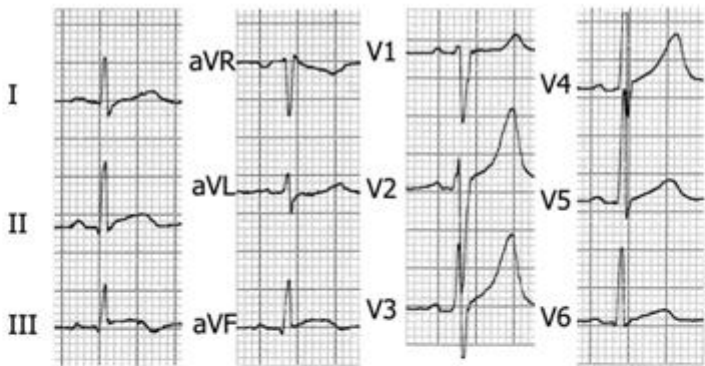

Supplement: MOESM2 [file 9556816]
